# Supplementary material for: Freeze Tolerance in Sculpins (Pisces; Cottoidea) Inhabiting North Pacific and Arctic Oceans: Antifreeze Activity and Gene Sequences of the Antifreeze Protein
Source: PubMed Central journal article supplement (PMC6523315; doi:10.3390/biom9040139), 2019-04-06
Supplement: biomolecules-09-00139-s001.pdf [file biomolecules-09-00139-s001.pdf]

Table S1. Accession number.

| Genus           | Species        | Accession no. |          |          |          |
|-----------------|----------------|---------------|----------|----------|----------|
|                 |                | 12-16S        | Cytb     | COI      | RAG1     |
| Rhamphocottus   | richardsoni    | LC126168      | LC125721 | LC125638 | LC125804 |
| Blepsias        | bilobus        | LC126246      | LC125799 | LC125716 | LC125882 |
| Hemitripteris   | villosus       | LC126241      | LC125794 | LC125711 | LC125877 |
| Anoplagonus     | occidentalis   | LC126220      | LC125773 | LC125690 | LC125856 |
| Aspidophoroides | monopterygius  | LC126221      | LC125774 | LC125691 | LC125857 |
| Ocella          | dodecaedron    | LC126219      | LC125772 | LC125689 | LC125855 |
| Odontopyxis     | trispinosa     | LC126217      | LC125770 | LC125687 | LC125853 |
| Pallasina       | barbata        | LC126218      | LC125771 | LC125688 | LC125854 |
| Podothecus      | accipenserinus | LC126216      | LC125769 | LC125686 | LC125852 |
| Ulcina          | olriki         | LC126239      | LC125792 | LC125709 | LC125875 |
| Dasycottus      | setiger        | LC126214      | LC125767 | LC125684 | LC125850 |
| Ebinania        | vermiculata    | LC126215      | LC125768 | LC125685 | LC125851 |
| Eurymen         | gyrinus        | LC126213      | LC125766 | LC125683 | LC125849 |
| Psychrolutes    | macrocephalus  | LC126236      | LC125789 | LC125706 | LC125872 |
| Jordania        | zonope         | LC126244      | LC125797 | LC125714 | LC125880 |
| Scorpaenichthys | marmoratus     | LC126201      | LC125754 | LC125671 | LC125837 |
| Hemilepidotus   | hemilepidotus  | LC126171      | LC125724 | LC125641 | LC125807 |
| Argyrocottus    | zanderi        | LC126187      | LC125740 | LC125657 | LC125823 |
| Enophrys        | bison          | LC126245      | LC125798 | LC125715 | LC125881 |
| Microcottus     | sellaris       | LC126197      | LC125750 | LC125667 | LC125833 |
| Myoxocephalus   | stelleri       | LC126228      | LC125781 | LC125698 | LC125864 |
| Porocottus      | allisi         | LC126227      | LC125780 | LC125697 | LC125863 |
| Gymnocanthus    | herzensteini   | LC126190      | LC125743 | LC125660 | LC125826 |
| Triglops        | jordania       | LC126170      | LC125723 | LC125640 | LC125806 |
| Artediellus     | neyelovi       | LC126184      | LC125737 | LC125654 | LC125820 |
| Arteidius       | harringtoni    | LC126183      | LC125736 | LC125653 | LC125819 |
| Chitonotus      | pugetensis     | LC126186      | LC125739 | LC125656 | LC125822 |
| Clinocottus     | analisis       | LC126200      | LC125753 | LC125670 | LC125836 |
| Oligocottus     | snyderi        | LC126198      | LC125751 | LC125668 | LC125834 |
| Icelus          | sekii          | LC126175      | LC125728 | LC125645 | LC125811 |
| Ricuzenius      | pinetorum      | LC126182      | LC125735 | LC125652 | LC125818 |
| Stelgistrum     | concinnum      | LC126174      | LC125727 | LC125644 | LC125810 |
| Icelinus        | japonicus      | LC126178      | LC125731 | LC125648 | LC125814 |
| Ascelichthys    | rhodorus       | LC126185      | LC125738 | LC125655 | LC125821 |
| Alcichthys      | alcicornis     | LC126202      | LC125755 | LC125672 | LC125838 |
| Bero            | elegans        | LC126242      | LC125795 | LC125712 | LC125878 |
| Furcina         | osimae         | LC126204      | LC125757 | LC125674 | LC125840 |
| Ocynectes       | modestus       | LC126237      | LC125790 | LC125707 | LC125873 |
| Pseudoblennius  | cottoides      | LC126206      | LC125759 | LC125676 | LC125842 |
| Vellitor        | centropomus    | LC126210      | LC125763 | LC125680 | LC125846 |

Figure S1. Nucleotide sequences of type I AFPs from three sculpins.

```

Gt skin 1 - - - - - c g a g c t a a a c a a a a g t g a g a A T G G A C - - - - - G C A C C A G C A A [ 78]
Hj skin 1 g a a g t t g t t g a t c t t t c t c t t t t c c a a a c g c a c . . . . a . . . . . T . . . . . T . . . . .
Pa skin 5 - - - - - c a c . . . . . T C A A A T G T C A . . . . . G .

Gt skin 1 G A G C A G C G G C A A A G A C G G C G G C G G A C G C G A A G G C T G C G G C G G C C A A G A C G G C G G C G G A C G C T G C T A A G G C G G C G G C C A [156]
Hj skin 1 . . . . . T . . . . . T . A G . . . . . T . . . . . T . . . . . G T T G G C T . . . . . A A G .
Pa skin 5 . . . . . C . . . . . T . . . . . C T A . . . . . A G . . . . . A G . . . . . T . . . . . A A A G G C T C T A . . . . . A G .

Gt skin 1 A G A C G G C T G C T A A A - - - - - T A A t [234]
Hj skin 1 . . . . . G . . G G . C - - - - - G C T G C A A A G A G C T T A G t c t c c g t a g a g c g g t . g c c
Pa skin 5 . . . . . G . . G G . T G C A A A A A C T G C G G C G G C G G C G G T T G C A G C A G C T G C T A G A G C T T A G t c t c c g t a g a g c a g t . g t c

Gt skin 1 t g g c a a a c a t a g t t a a t t t g t t c a g t a a t g c a t a a - - - - - a t t a c a c t a t a a g g t t c t t t t a g g g t g t g t g [312]
Hj skin 1 . . c t t . t a . . g c . c g . . a . . g g c a a c . a a . . . . g t t a a t t t g t t c a g . a . t g . a c a . g t t a c a c . a . . a . . t c t . t
Pa skin 5 . . c a t . t a . . . c . c g . . a . . g g c a a c . a a . . . . g t t a a t t t g t t c a g . a . t g . . c a . g t t a c a c . a . . a . . t c t . t

Gt skin 1 t g t a g g g g g t g g g g g t - a t g g t t t g t c t a t g c t t a a t t c t t a a t c c c t g a t g t t g c t g a c c c a a c t c a - - - - - [390]
Hj skin 1 . a - - . c . . g . . . t g g . g . . g g g . . . c . . . . a . t . . . . .
Pa skin 5 . a g g . . . . a g . . . c - - - - - . . . . . g t g t g g t g c t

Gt skin 1 - - - - - [468]
Hj skin 1 - - - - -
Pa skin 5 g g t t c a t g t a g c t g a a t a g c a c a g g t t a t t a a a a c g t a a a t t c a a g t a t g g a a c a c a c a t g t t a t t t t g t t t t g a g a a

Gt skin 1 - - - - - [546]
Hj skin 1 - - - - -
Pa skin 5 a c a c a t g c a a t c a a a c a a a a a a c a t c t t g a g a c g t t c c t g t t g t g a a t c a g t t t a a t c a a t t t a g a t c a a t t t a g t g g

Gt skin 1 - - - - - [624]
Hj skin 1 - - - - -
Pa skin 5 t t a a a a a c c t g c t g c t t a g a t c t c a t a a c c a a t a a t t t g t t t t a c a g c c c g g g a a a a g t g a a a a c c t c c a c a a a g a t

Gt skin 1 - - - - - [656]
Hj skin 1 - - - - -
Pa skin 5 c t t t c t t t g g a g c t a a t g t a g t a g c t t a a a g a

```
